# Supplementary material for: Starvation tolerance associated with prolonged sleep bouts upon starvation in a single natural population of Drosophila melanogaster
Source: PubMed Central journal article supplement — J Evol Biol. 2019 Aug 20;32(10):1117–23. doi: 10.1111/jeb.13514 (PMC6851687; doi:10.1111/jeb.13514), 2019-08-20
Supplement: JEB-32-1117-s001.pdf [file JEB-32-1117-s001.pdf]

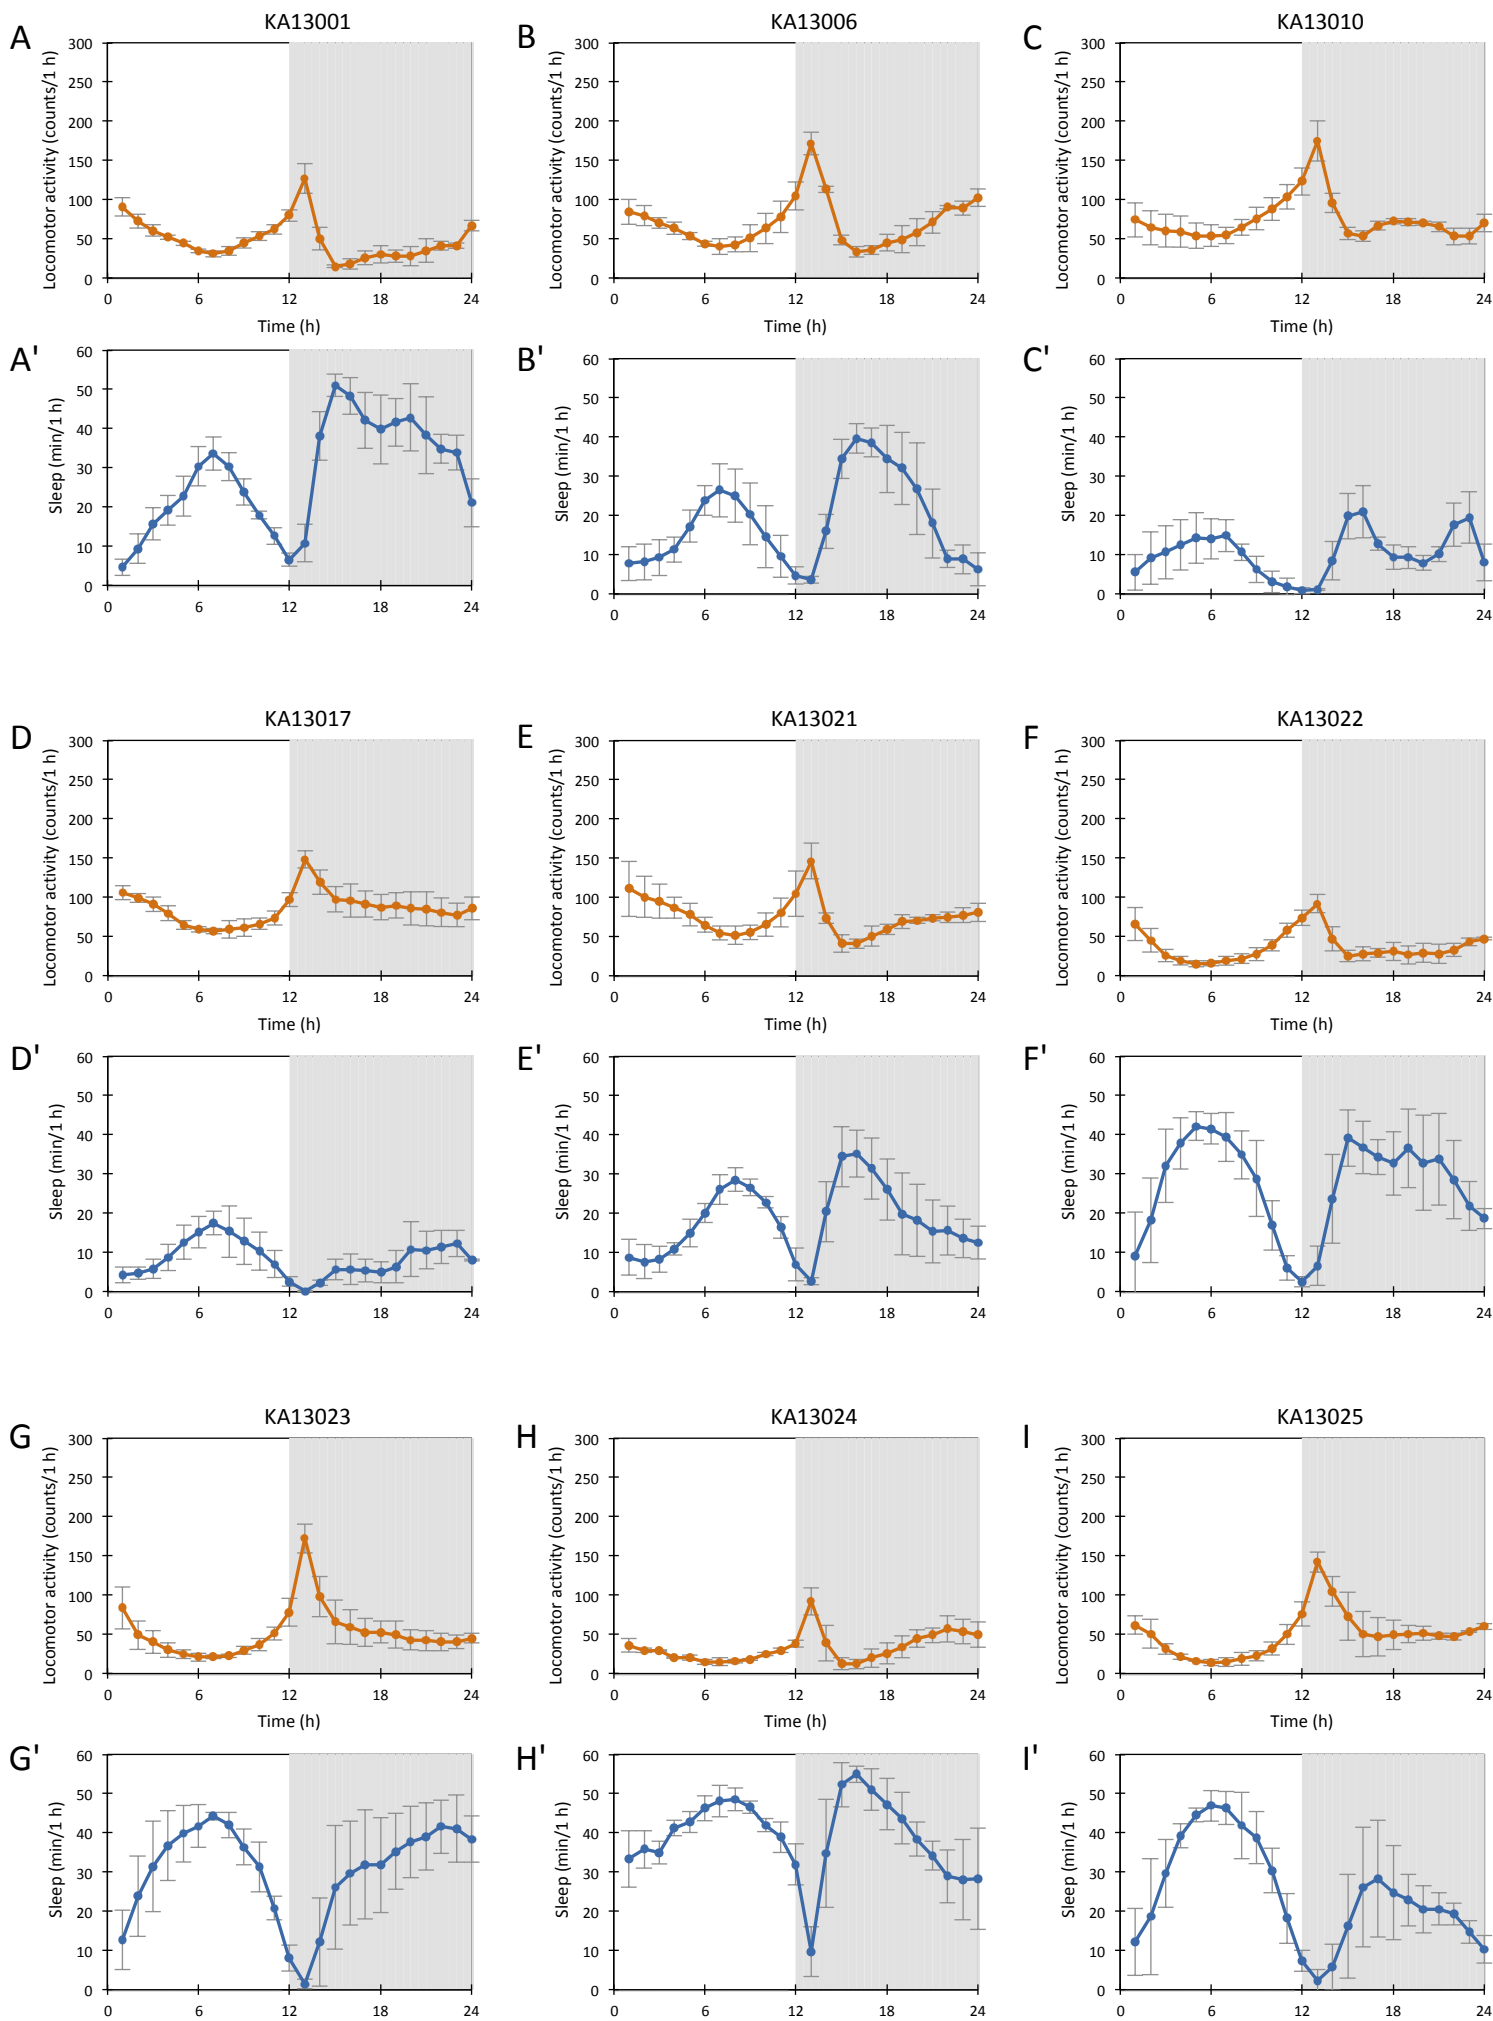

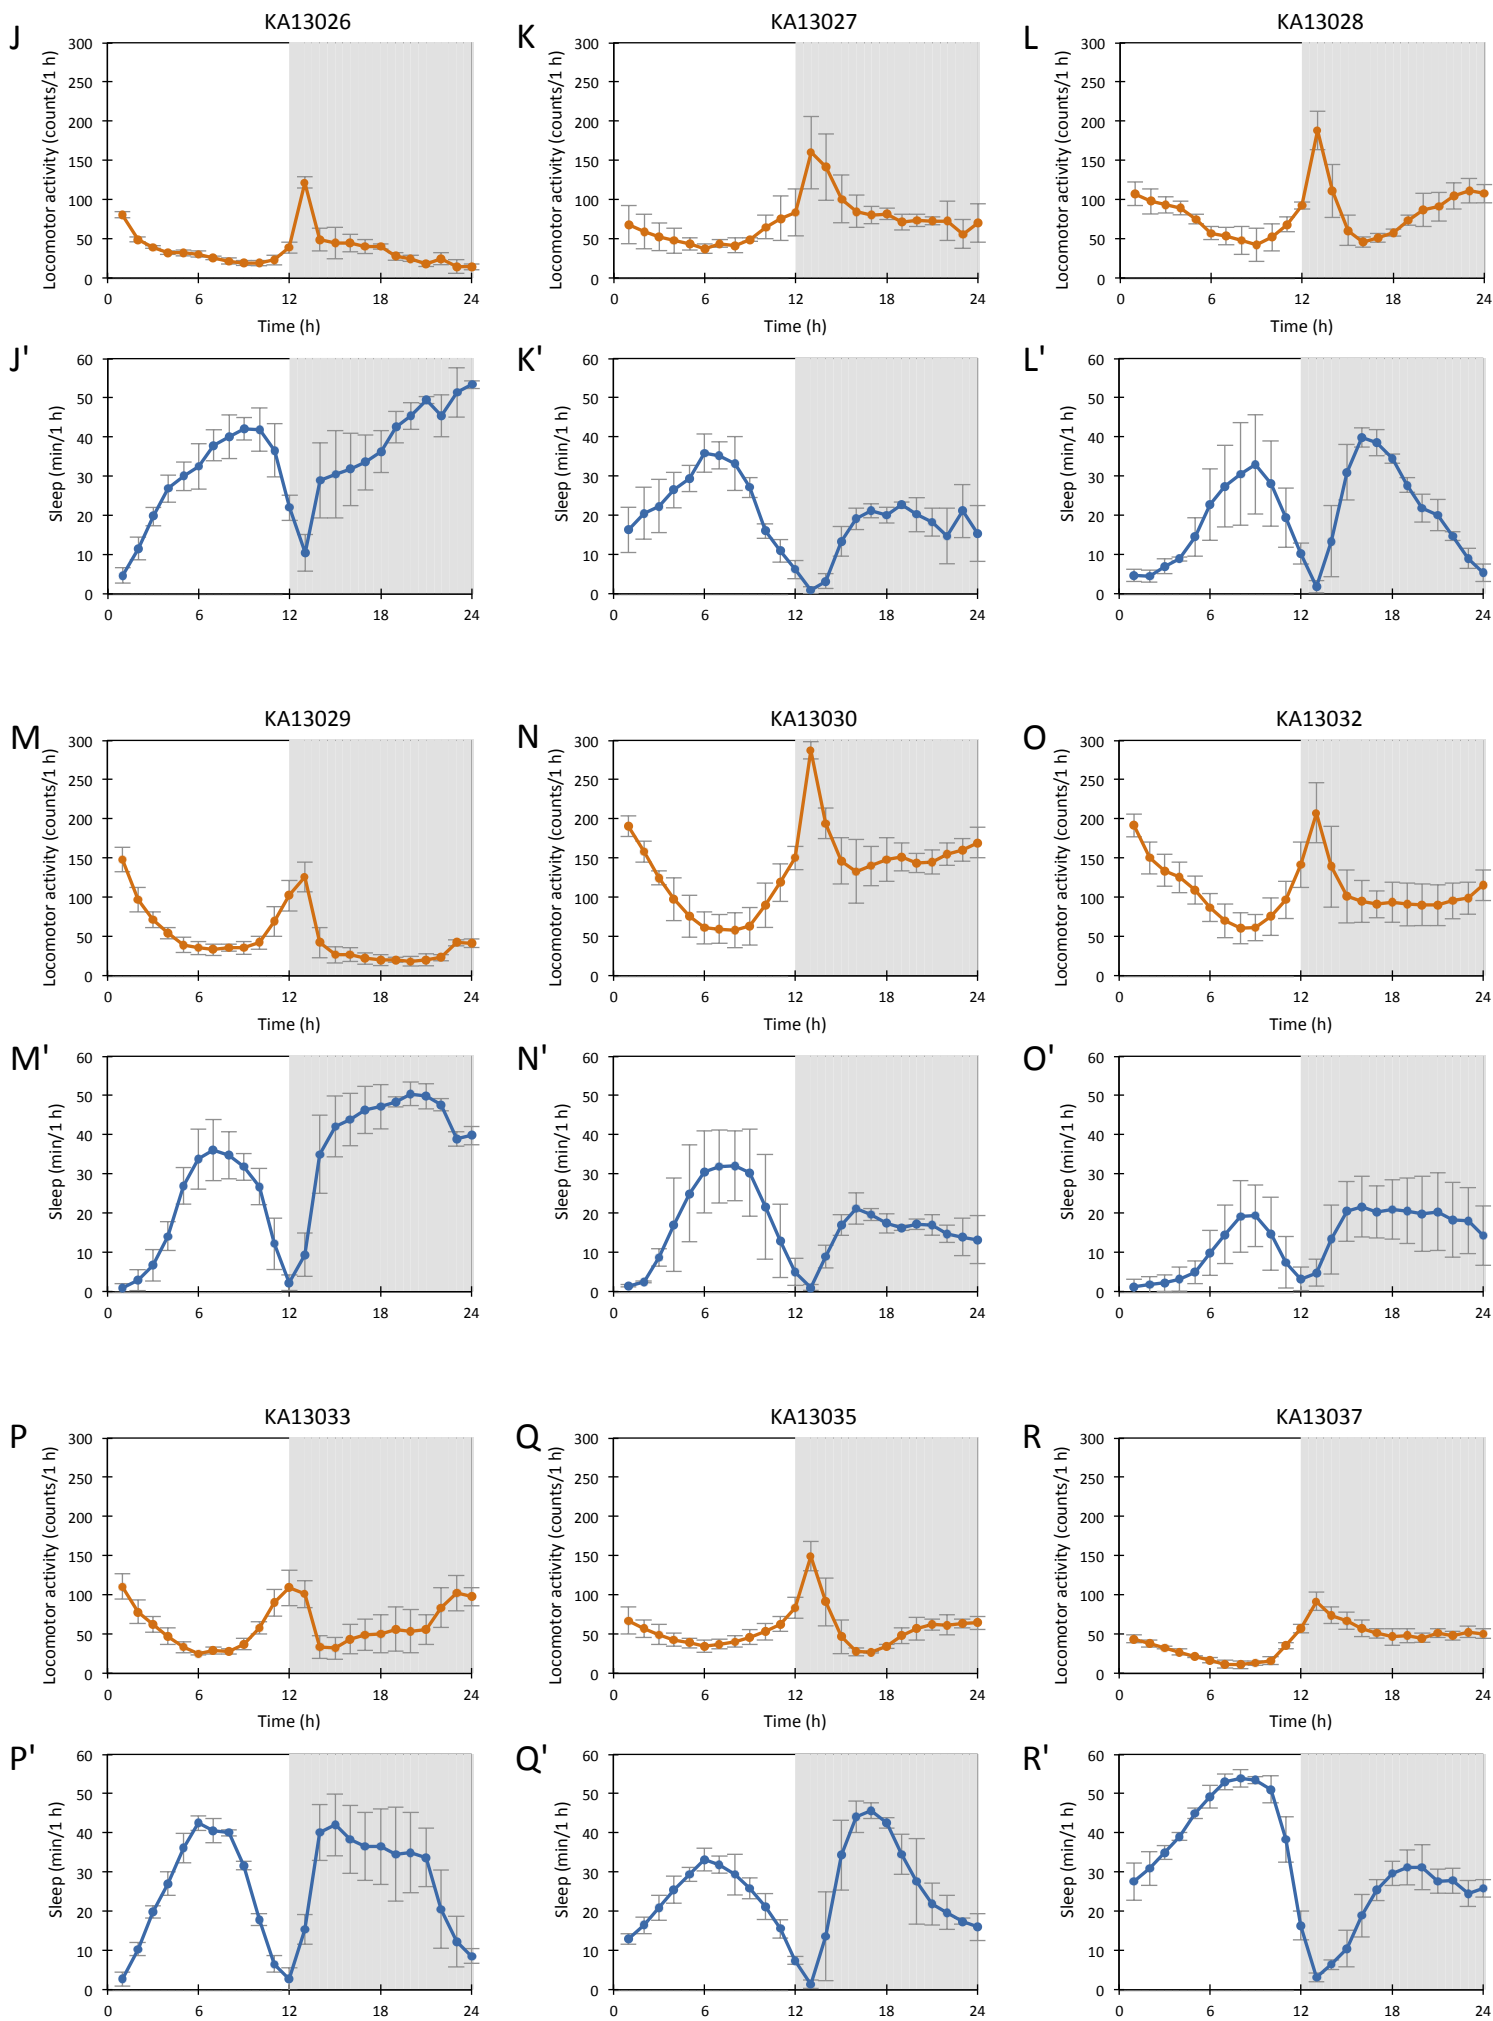

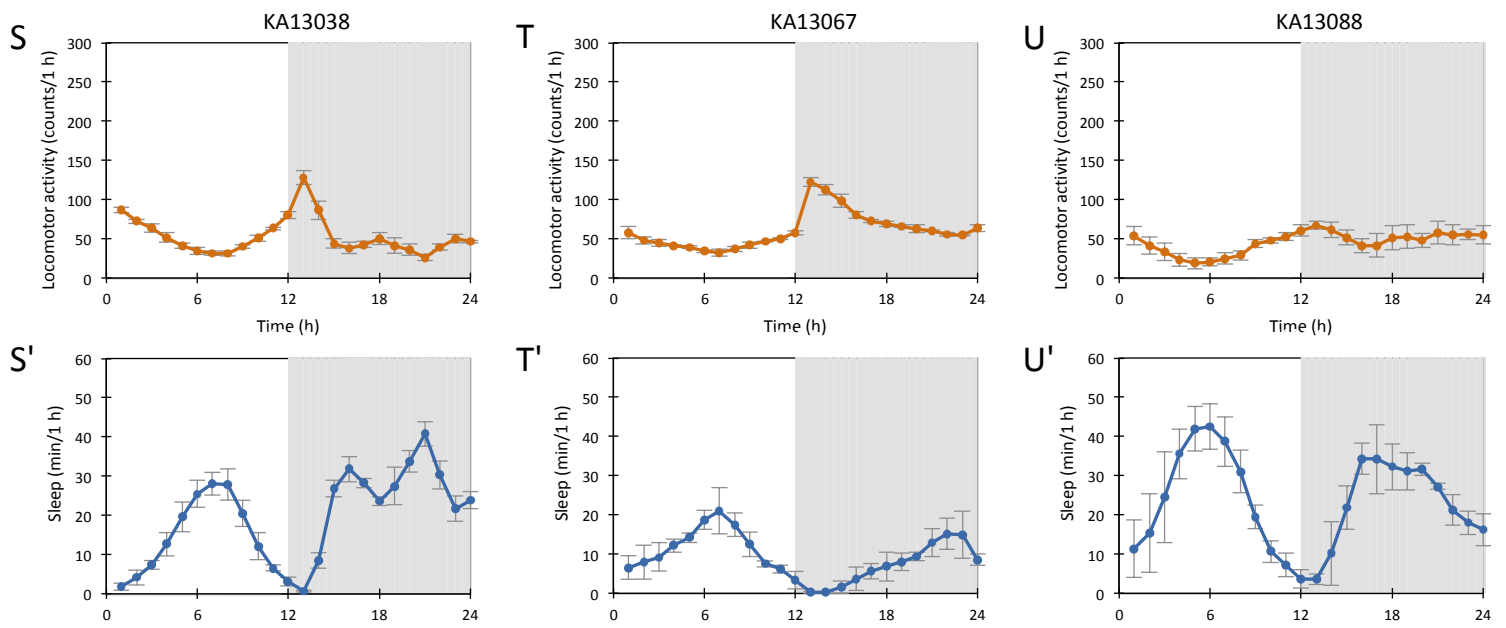

**Appendix S1. Locomotor activity and sleep profiles over a 24-h period in 21 lines from Katsunuma, Japan**

A–U. Locomotor activity profiles obtained from DAM2 data over a 24-h period. A'–U'. Sleep profiles obtained from DAM2 data over 24-h period. A, A'. KA13001. B, B'. KA13006. C, C'. KA13010. D, D'. KA13017. E, E'. KA13021. F, F'. KA13022. G, G'. KA13023. H, H'. KA13024. I, I'. KA13025. J, J'. KA13026. K, K'. KA13027. L, L'. KA13028. M, M'. KA13029. N, N'. KA13030. O, O'. KA13032. P, P'. KA13033. Q, Q'. KA13035. R, R'. KA13037. S, S'. KA13038. T, T'. KA13067. U, U'. KA13088. The activity data of the fed flies 2 to 4 days after beginning the measurements (L2–D4 periods) were analyzed. Error bars indicate standard deviations of three replicate measurements.
