# Supplementary material for: Starvation tolerance associated with prolonged sleep bouts upon starvation in a single natural population of Drosophila melanogaster
Source: PubMed Central journal article supplement — J Evol Biol. 2019 Aug 20;32(10):1117–23. doi: 10.1111/jeb.13514 (PMC6851687; doi:10.1111/jeb.13514), 2019-08-20
Supplement: JEB-32-1117-s002.pdf [file JEB-32-1117-s002.pdf]

**Appendix S2 Broad-sense heritability estimates of sleep-related phenotypes of flies reared under the regular food condition.**

|                     | <u>Total time in sleep (h/12 h)</u> |            | <u>Sleep-bout number (/12 h)</u> |            | <u>Sleep-bout length (min)</u> |            | <u>Wake time activity (counts/min)</u> |            |
|---------------------|-------------------------------------|------------|----------------------------------|------------|--------------------------------|------------|----------------------------------------|------------|
|                     | Light hours                         | Dark hours | Light hours                      | Dark hours | Light hours                    | Dark hours | Light hours                            | Dark hours |
| Variance components |                                     |            |                                  |            |                                |            |                                        |            |
| Replication:Line    | 0.37                                | 0.75       | 38.4                             | 13.6       | 3.82                           | 16.6       | 0.021                                  | 0.038      |
| Line                | 3.18                                | 3.38       | 286.9                            | 118.8      | 23.64                          | 80.7       | 0.122                                  | 0.216      |
| Residual            | 2.82                                | 3.77       | 433.0                            | 290.2      | 65.21                          | 251.0      | 0.117                                  | 0.151      |
| Heritability        | 0.50                                | 0.43       | 0.38                             | 0.28       | 0.26                           | 0.23       | 0.47                                   | 0.53       |
