# Supplementary material for: Starvation tolerance associated with prolonged sleep bouts upon starvation in a single natural population of Drosophila melanogaster
Source: PubMed Central journal article supplement — J Evol Biol. 2019 Aug 20;32(10):1117–23. doi: 10.1111/jeb.13514 (PMC6851687; doi:10.1111/jeb.13514), 2019-08-20
Supplement: JEB-32-1117-s005.pdf [file JEB-32-1117-s005.pdf]

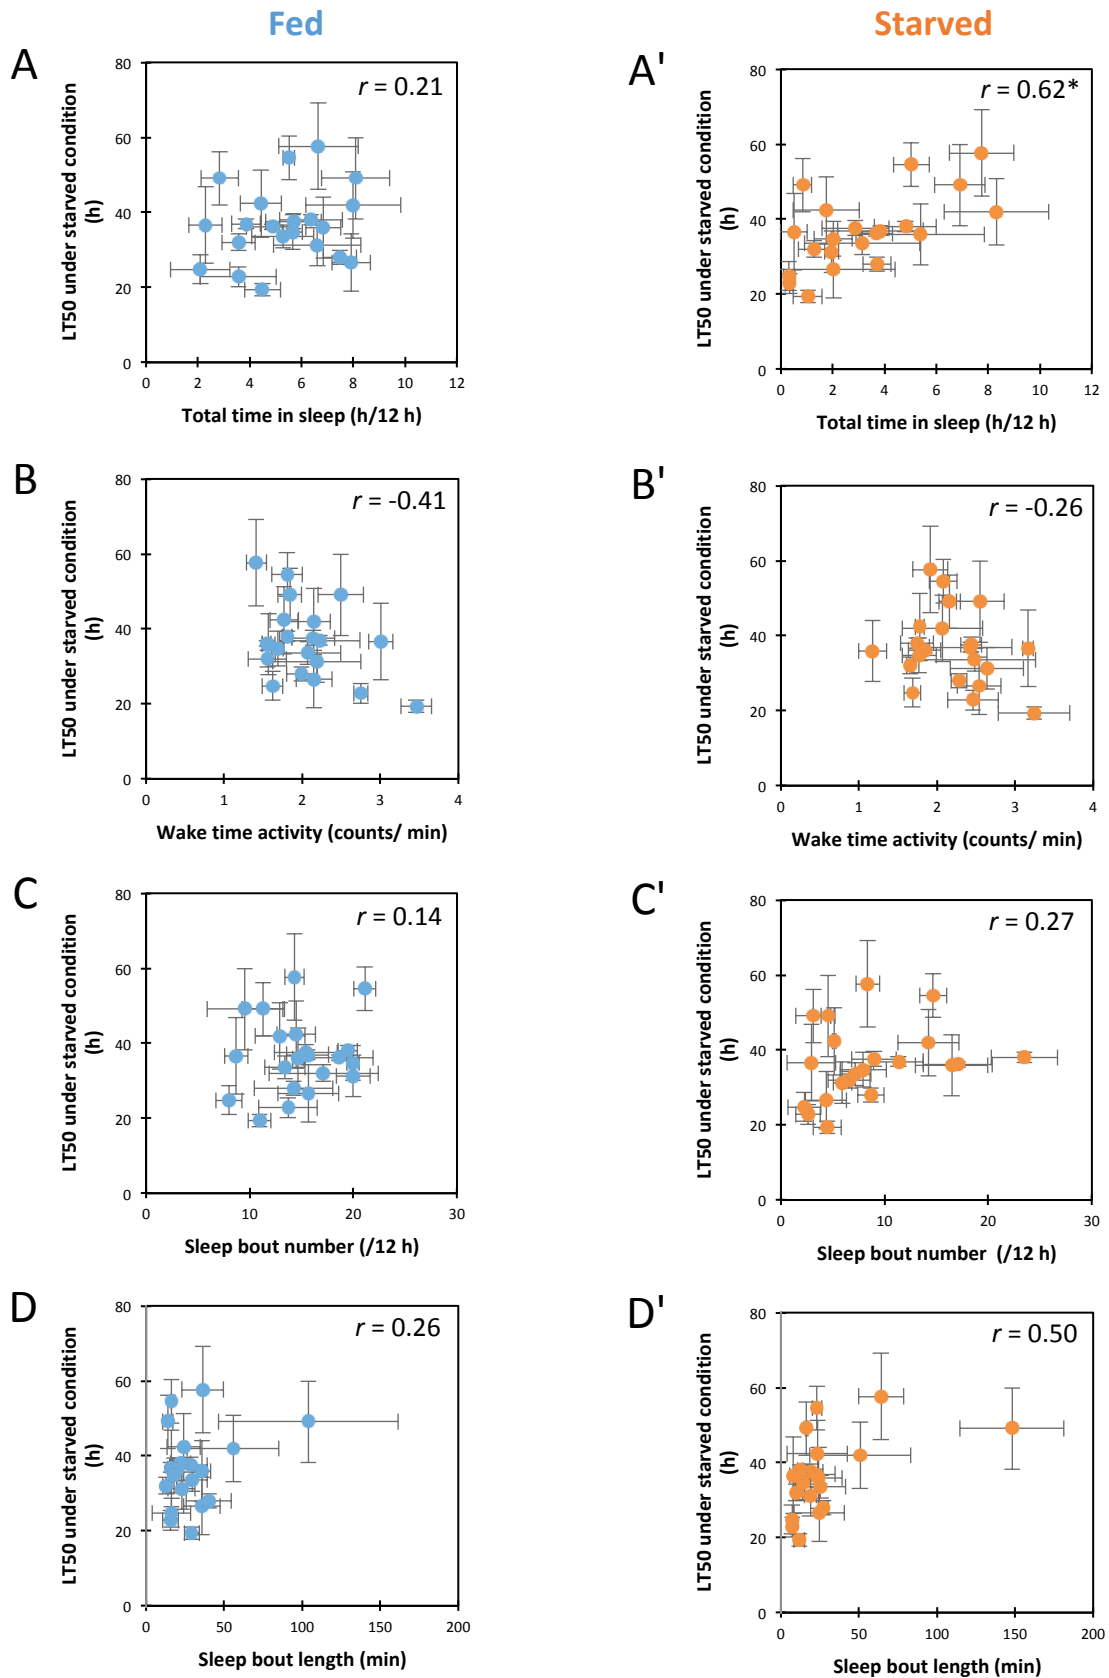

**Appendix S5. The relationship between sleep-related traits of Katsunuma lines under the fed and starved conditions in the first dark period (D0, 6–18 h after starting the measurement) and the survival time (LT50) under starved conditions**

A. The relationship between total time in sleep under fed conditions and the LT50 under starved conditions. A'. The relationship between total time in sleep and the LT50 under starved conditions. B. The relationship between wake-time activity under fed conditions and the LT50 under starved conditions. B'. The relationship between wake-time activity and the LT50 under starved conditions. C. The relationship between sleep-bout number under fed conditions and the LT50 under starved conditions. C'. The relationship between sleep-bout number and the LT50 under starved conditions. D. The relationship between sleep-bout length under fed conditions and the LT50 under starved conditions. D'. The relationship between sleep-bout length and the LT50 under starved conditions. Pearson's correlation coefficient ( $r$ ) is indicated in each panel. \*  $p < 0.05$  after applying the Bonferroni correction for multiple testing (eight tests). Error bars indicate standard deviations.
